# Supplementary material for: Radiolabelling of Extracellular Vesicles for PET and SPECT imaging
Source: PubMed Central journal article supplement (PMC7914338; doi:10.7150/ntno.51676), 2021-02-13
Supplement: ntnov05p0256s1.pdf [file ntnov05p0256s1.pdf]

**Supplementary Information for:**

**Radiolabelling Extracellular Vesicles for  
PET and SPECT imaging**

Azalea A. Khan and Rafael T. M. de Rosales\*

Dept. of Imaging Chemistry and Biology  
School of Biomedical Engineering and Imaging Sciences  
King's College London  
St. Thomas' Hospital,  
London, United Kingdom

\*E-mail: [rafael.torres@kcl.ac.uk](mailto:rafael.torres@kcl.ac.uk)

## **Methodology**

In order to identify articles on EV radiolabelling to date (July, 2020), search was performed on 'Web of Science' database using 'exosom\*', 'microvesic\*', 'EVs', 'extracellular vesicle\*' as topics in combination with 'positron emission tomography', 'PET', 'single photon emission computed tomography', 'SPECT', 'radiolabel\*', 'radionuclide imaging' and 'nuclear imaging'. Conference abstracts, reviews and book chapters were excluded. Separate searches were performed on the pre-print servers, chemRxiv and bioRxiv, using the same terminologies as above. A total of 16 published articles were found and analysed in this review. Of these, 2 articles were found on bioRxiv and chemRxiv each. 11 of those articles were on SPECT imaging and 5 of them were on PET imaging, and was analysed to create Figure 3.
